# Supplementary material
Source: publisher site journal article supplement (https://www.dovepress.com/article/601086)
Supplement: Supplementary file 1 [file 601086%20Supplementary%20Material.docx]

**Supplementary Table S1.** Risk factors for refractory breathlessness

|  | **Unadjusted OR (95% CI)** | **P-value** | **Adjusted OR (95% CI)** | **P-value** |
| --- | --- | --- | --- | --- |
| **Age** | 1.004 (0.983-1.026) | 0.695 | 1.010 (0.984–1.037) | 0.463 |
| **Male** | 1.151 (0.571-2.320) | 0.695 | 0.572 (0.208–1.574) | 0.279 |
| **BMI** | 0.938 (0.884-0.994) | 0.031 | 0.994 (0.926–1.067) | 0.871 |
| **Smoking status (Ref: Never smoker)** |  |  |  |  |
| Ex-smoker | 2.241 (1.229-4.089) | 0.009 | 2.153 (0.952–4.865) | 0.065 |
| Current smoker | 2.525 (1.358-4.694) | 0.003 | 2.556 (1.098–5.946) | 0.029 |
| **Pack-years** | 1.008 (1.000-1.016) | 0.052 | - | - |
| **Charlson comorbidity index (Ref: 1)** |  |  |  |  |
| 2 | 2.071 (1.24-3.459) | 0.005 | 2.178 (1.229–3.860) | 0.008 |
| ≥3 | 1.597 (0.909-2.806) | 0.104 | 1.668 (0.891–3.124) | 0.110 |
| **mMRC (Ref: 1)** |  |  |  |  |
| 2 | 0.723 (0.383-1.366) | 0.318 | 0.617 (0.306–1.243) | 0.177 |
| ≥3 | 5.786 (2.172-15.415) | <0.001 | 4.028 (1.367–11.870) | 0.012 |
| **Prior history of moderate-to-severe exacerbation**  **within 1 year** | 1.808 (1.186-2.758) | 0.006 | 1.744 (1.078–2.821) | 0.023 |
| **Blood white blood cell count, 1000/uL** | 1.072 (1.008-1.141) | 0.028 | - | - |
| **Blood neutrophil, %** | 1.021 (1.005-1.037) | 0.010 | - | - |
| **Blood neutrophil count, 1000/uL** | 1.079 (1.010-1.152) | 0.023 | 1.056 (0.990–1.127) | 0.099 |
| **Blood lymphocyte, %** | 0.973 (0.955-0.992) | 0.005 | - | - |
| **Blood lymphocyte count, 1000/uL** | 0.929 (0.740-1.166) | 0.526 | 1.069 (0.811–1.410) | 0.634 |
| **Blood neutrophil/lymphocyte ratio** | 1.026 (0.981-1.073) | 0.263 | - | - |
| **Blood eosinophil, %** | 0.967 (0.904-1.034) | 0.327 | - | - |
| **Blood eosinophil count, 1000/uL** | 0.823 (0.348-1.944) | 0.657 | - | - |
| **Blood eosinophil count >300/uL** | 0.999 (0.617-1.618) | 0.997 | - | - |
| **FEV1, L** | 0.536 (0.357-0.806) | 0.003 | - | - |
| **FEV1, % of predicted value** | 0.981 (0.969-0.993) | 0.002 | - | - |
| **FEV1, z-score** | 0.710 (0.571-0.884) | 0.002 | 0.943 (0.680–1.307) | 0.724 |
| **FVC, L** | 0.810 (0.632-1.039) | 0.097 | - | - |
| **FVC, % of predicted value** | 0.994 (0.983-1.004) | 0.248 | - | - |
| **FVC, z-score** | 0.900 (0.775-1.045) | 0.165 | - | - |
| **FEV1/FVC, %** | 0.974 (0.956-0.991) | 0.004 | - | - |
| **FEV1/FVC, z-score** | 0.756 (0.593-0.963) | 0.024 | 1.256 (0.849–1.860) | 0.254 |
| **FEF25-75, L/s** | 0.799 (0.397-1.610) | 0.531 | - | - |
| **FEF25-75, % of predicted value** | 0.995 (0.975-1.015) | 0.616 | - | - |
| **DLCO, mL/min/mmHg** | 0.878 (0.838-0.921) | <0.001 | - | - |
| **DLCO, % of predicted value** | 0.974 (0.965-0.984) | <0.001 | 0.979 (0.967–0.991) | <0.001 |
| **LAA (-950 HU in inspiratory CT), %** | 1.040 (1.015-1.065) | 0.001 | 1.024 (0.988–1.061) | 0.196 |
| **Pi10, mm** | 1.147 (0.984-1.337) | 0.078 | 1.239 (1.032–1.487) | 0.021 |

BMI, body mass index; CT, computed tomography; DLCO, diffusing capacity for carbon monoxide; FEF25-75, forced expiratory flow at 25% to 75% of the forced vital capacity; FEV1, forced expiratory volume in 1 second; FVC, forced vital capacity; LAA, low-attenuation area; mMRC, modified Medical Research Council; NLR, neutrophil-to-lymphocyte ratio; Pi10, perimeter of the airway wall at 10 mm of internal diameter; SD, standard deviation; WBC, white blood cell

**Supplementary Table S2.** Comparison of factors potentially contributing to refractory breathlessness between groups

|  | **Refractory breathlessness group (n=244)** | **Improved breathlessness group (n=161)** | **P-value** |
| --- | --- | --- | --- |
| **COPD-related factors** |  |  |  |
| Severe hyperinflation | 106 (43.4) | 66 (41.0) | 0.700 |
| Severe emphysema | 118 (48.4) | 50 (31.1) | 0.001 |
| Severe airflow limitation | 118 (48.4) | 45 (28.0) | <0.001 |
| Current smoking | 69 (28.3) | 31 (19.3) | 0.052 |
| Exacerbation event during treatment | 84 (34.4) | 10 (6.2) | <0.001 |
| Occupational exposure | 4 (1.6) | 1 (0.6) | 0.654 |
| **Non-respiratory comorbidities** |  |  |  |
| Advanced deconditioning | 92 (37.7) | 25 (15.5) | <0.001 |
| Cardiovascular disease | 66 (27.0) | 19 (11.8) | <0.001 |
| Obesity | 46 (18.9) | 38 (23.6) | 0.304 |
| Pulmonary hypertension | 34 (13.9) | 7 (4.3) | 0.003 |
| Depression or anxiety | 30 (12.3) | 7 (4.3) | 0.011 |
| Arrhythmia | 24 (9.8) | 7 (4.3) | 0.065 |
| Cognitive impairment | 19 (7.8) | 6 (3.7) | 0.147 |
| Severe anemia | 13 (5.3) | 2 (1.2) | 0.063 |
| **Respiratory comorbidities** |  |  |  |
| TB-destroyed lung | 57 (23.4) | 32 (19.9) | 0.480 |
| Bronchiectasis | 35 (14.3) | 29 (18.0) | 0.395 |
| Lung cancer | 24 (9.8) | 9 (5.6) | 0.179 |
| Giant bulla | 19 (7.8) | 1 (0.6) | 0.003 |
| Interstitial lung disease | 14 (5.7) | 4 (2.5) | 0.191 |
| Endobronchial stenosis | 11 (4.5) | 2 (1.2) | 0.124 |
| NTM pulmonary disease | 5 (2.0) | 4 (2.5) | 1.000 |
| Fungal infection | 5 (2.0) | 3 (1.9) | 1.000 |
| Thoracic wall abnormality | 1 (0.4) | 4 (2.5) | 0.164 |
| Upper airway disease | 2 (0.8) | 2 (1.2) | 1.000 |
| Pulmonary thromboembolism | 1 (0.4) | 1 (0.6) | 1.000 |
| **Device-related factors** |  |  |  |
| Multiple device | 122 (50.0) | 42 (26.1) | <0.001 |
| Poor adherence | 107 (43.9) | 26 (16.1) | <0.001 |
| Poor technique | 97 (39.8) | 27 (16.8) | <0.001 |
| Low inhalability | 73 (29.9) | 25 (15.5) | 0.001 |

COPD, chronic obstructive pulmonary disease; NTM, non-tuberculous mycobacteria; TB, tuberculosis

**Supplementary Table S3.** E-values for potential causes of refractory breathlessness

| **Potential causes of refractory breathlessness** | **Estimated E-value** | **Lower CI** | **Upper CI** |
| --- | --- | --- | --- |
| **Exacerbation event during treatment** | 11.396 | 4.887 | 25.569 |
| **Pulmonary hypertension** | 4.684 | 1.091 | 13.140 |
| **Cardiovascular disease** | 5.288 | 2.497 | 10.397 |
| **Severe anemia** | 8.991 | 1.033 | 44.822 |
| **Depression or anxiety** | 5.136 | 1.545 | 13.659 |
| **Advanced deconditioning** | 4.830 | 2.482 | 8.808 |
| **Giant bulla** | 23.039 | 2.370 | 184.055 |
| **Endobronchial stenosis** | 15.447 | 2.266 | 87.099 |
| **Poor adherence** | 9.362 | 5.106 | 16.767 |
| **Low inhalability*** | 3.108 | 1.255 | 6.035 |
| **Poor inhaler device technique** | 5.534 | 2.946 | 9.907 |
| **Multiple device** | 3.860 | 2.100 | 6.593 |

CI, confidence interval; ln, logarithmus Naturalis; OR, odds ratio; RB-Score, Refractory Breathlessness Score

*Apply to only DPI user

**Supplementary Table S4.** Risk stratification of refractory breathlessness based on RB-Score

| RB-score | Risk group | Risk of refractory breathlessness |
| --- | --- | --- |
| ≤1.5 (n=146) | Low | 26% (19.6%–33.7%) |
| 2.0–3.0 (=100) | Intermediate | 66% (56.3%–74.5%) |
| 3.5–5.5 (=125) | High | 85% (77.5%–90.0%) |
| ≥6.0 (=34) | Very high | 100% (89.8%–100.0%) |

**Supplementary Table S5.** Sensitivity, Specificity, PPV, NPV for refractory breathlessness

|  | **AUROC**  **(95% CI)** | **Sensitivity**  **(95% CI)** | **Specificity**  **(95% CI)** | **PPV**  **(95% CI)** | **NPV**  **(95% CI)** |
| --- | --- | --- | --- | --- | --- |
| **RB-score** | 0.85 (0.82-0.89) | 0.84 (0.79-0.88) | 0.70 (0.63-0.77) | 0.81 (0.76-0.86) | 0.75 (0.68-0.81) |
| **Exacerbation event during treatment** | 0.64 (0.61-0.68) | 0.34 (0.29-0.41) | 0.94 (0.89-0.97) | 0.89 (0.82-0.94) | 0.49 (0.43-0.54) |
| **Pulmonary hypertension** | 0.55 (0.52-0.57) | 0.14 (0.10-0.19) | 0.96 (0.91-0.98) | 0.83 (0.69-0.91) | 0.42 (0.37-0.47) |
| **Cardiovascular disease** | 0.58 (0.54-0.61) | 0.27 (0.22-0.33) | 0.88 (0.82-0.92) | 0.78 (0.68-0.85) | 0.44 (0.39-0.50) |
| **Severe anemia** | 0.52 (0.50-0.54) | 0.05 (0.03-0.09) | 0.99 (0.96-1.00) | 0.87 (0.62-0.96) | 0.41 (0.36-0.46) |
| **Depression or anxiety** | 0.54 (0.51-0.57) | 0.12 (0.09-0.17) | 0.96 (0.91-0.98) | 0.81 (0.66-0.91) | 0.42 (0.37-0.47) |
| **Advanced deconditioning** | 0.61 (0.57-0.65) | 0.38 (0.32-0.44) | 0.84 (0.78-0.89) | 0.79 (0.70-0.85) | 0.47 (0.42-0.53) |
| **Giant bulla** | 0.54 (0.52-0.55) | 0.08 (0.05-0.12) | 0.99 (0.97-1.00) | 0.95 (0.76-0.99) | 0.42 (0.37-0.47) |
| **Endobronchial stenosis** | 0.52 (0.50-0.53) | 0.05 (0.03-0.08) | 0.99 (0.96-1.00) | 0.85 (0.58-0.96) | 0.41 (0.36-0.45) |
| **Poor adherence** | 0.64 (0.60-0.68) | 0.44 (0.38-0.50) | 0.84 (0.77-0.89) | 0.80 (0.73-0.86) | 0.50 (0.44-0.56) |
| **Low inhalability** | 0.57 (0.53-0.61) | 0.30 (0.25-0.36) | 0.84 (0.78-0.89) | 0.74 (0.65-0.82) | 0.44 (0.39-0.50) |
| **Poor inhaler device technique** | 0.61 (0.57-0.66) | 0.40 (0.34-0.46) | 0.83 (0.77-0.88) | 0.78 (0.70-0.85) | 0.48 (0.42-0.54) |
| **Multiple device** | 0.62 (0.57-0.67) | 0.50 (0.44-0.56) | 0.74 (0.67-0.80) | 0.74 (0.67-0.80) | 0.49 (0.43-0.56) |

*CI, confidence interval;* NPV, negative predictive value; PPV, positive predictive value

**Supplementary Figure S1.** Directed acyclic graph

**
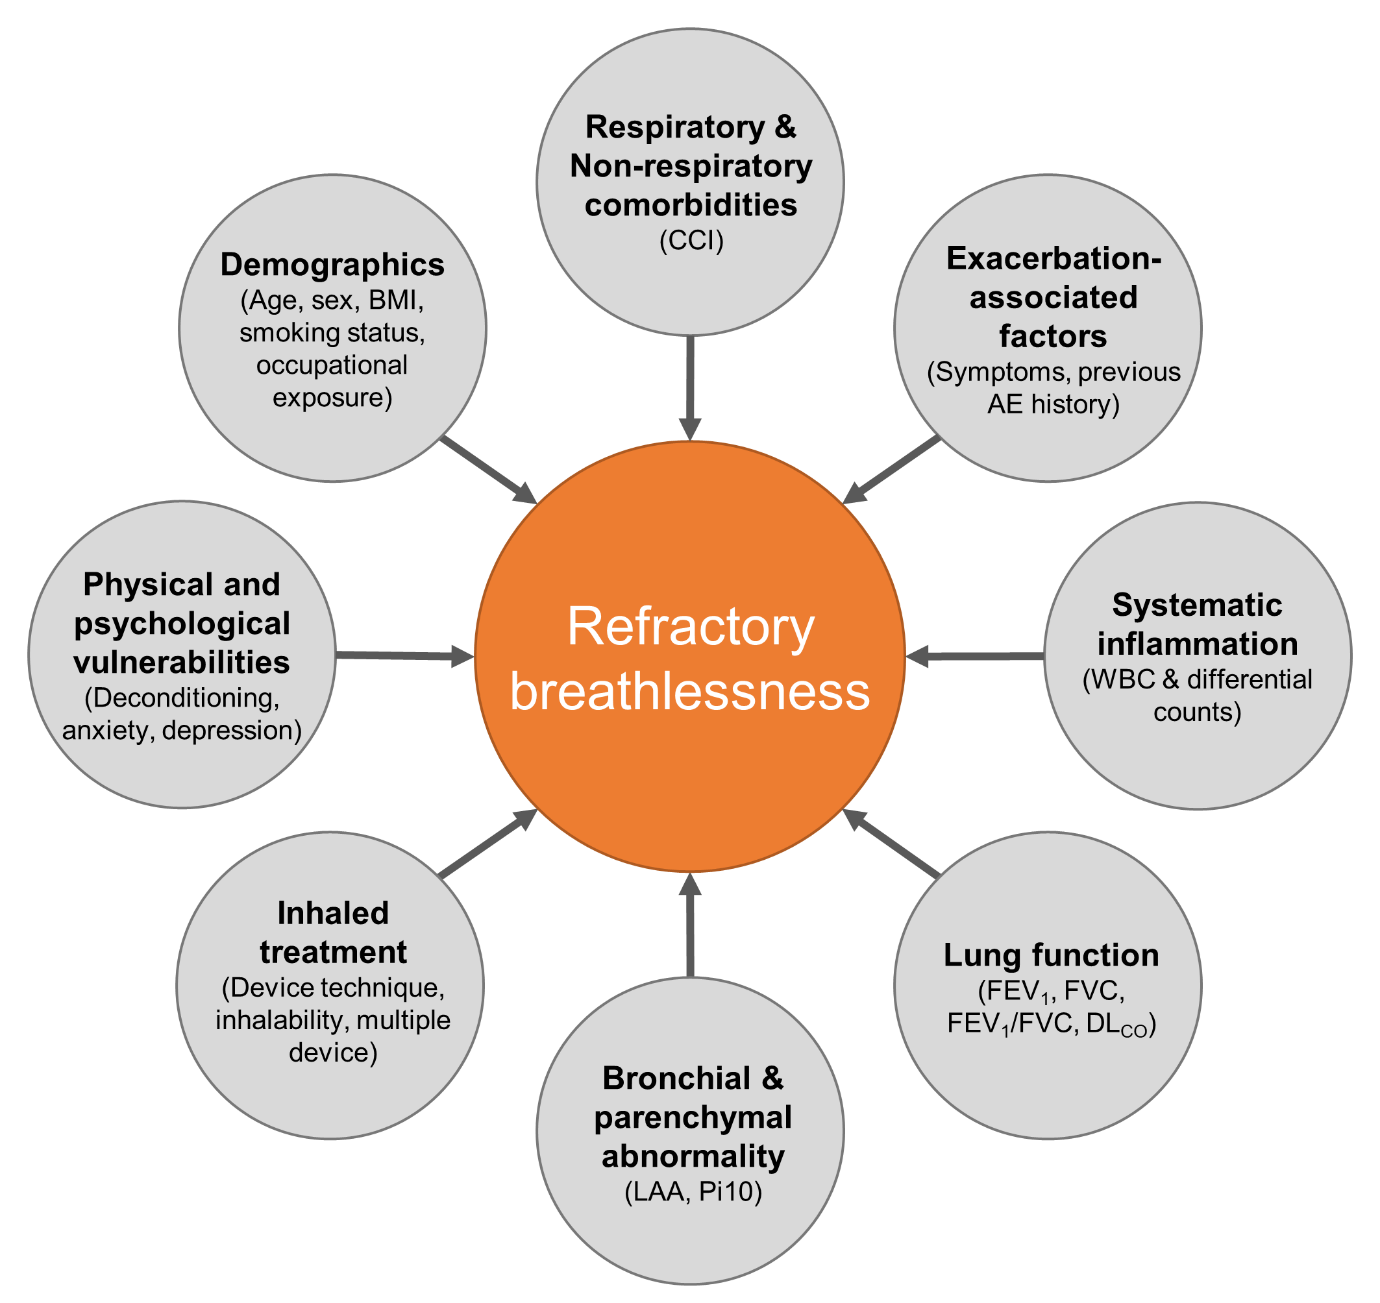
**

AE, acute exacerbation; BMI, body mass index; CCI, Charlson comorbidity index; DLCO, diffusing capacity for carbon monoxide; FEV₁, forced expiratory volume in 1 second; FEV₁/FVC, forced expiratory volume in 1 second to forced vital capacity ratio; FVC, forced vital capacity; LAA, low-attenuation area; Pi₁₀, square root of the wall area of a theoretical airway with an internal perimeter of 10 mm; WBC, white blood cell

**Supplementary Figure S2.** Prevalence of potential causes contributing to refractory breathlessness in refractory breathlessness group

**
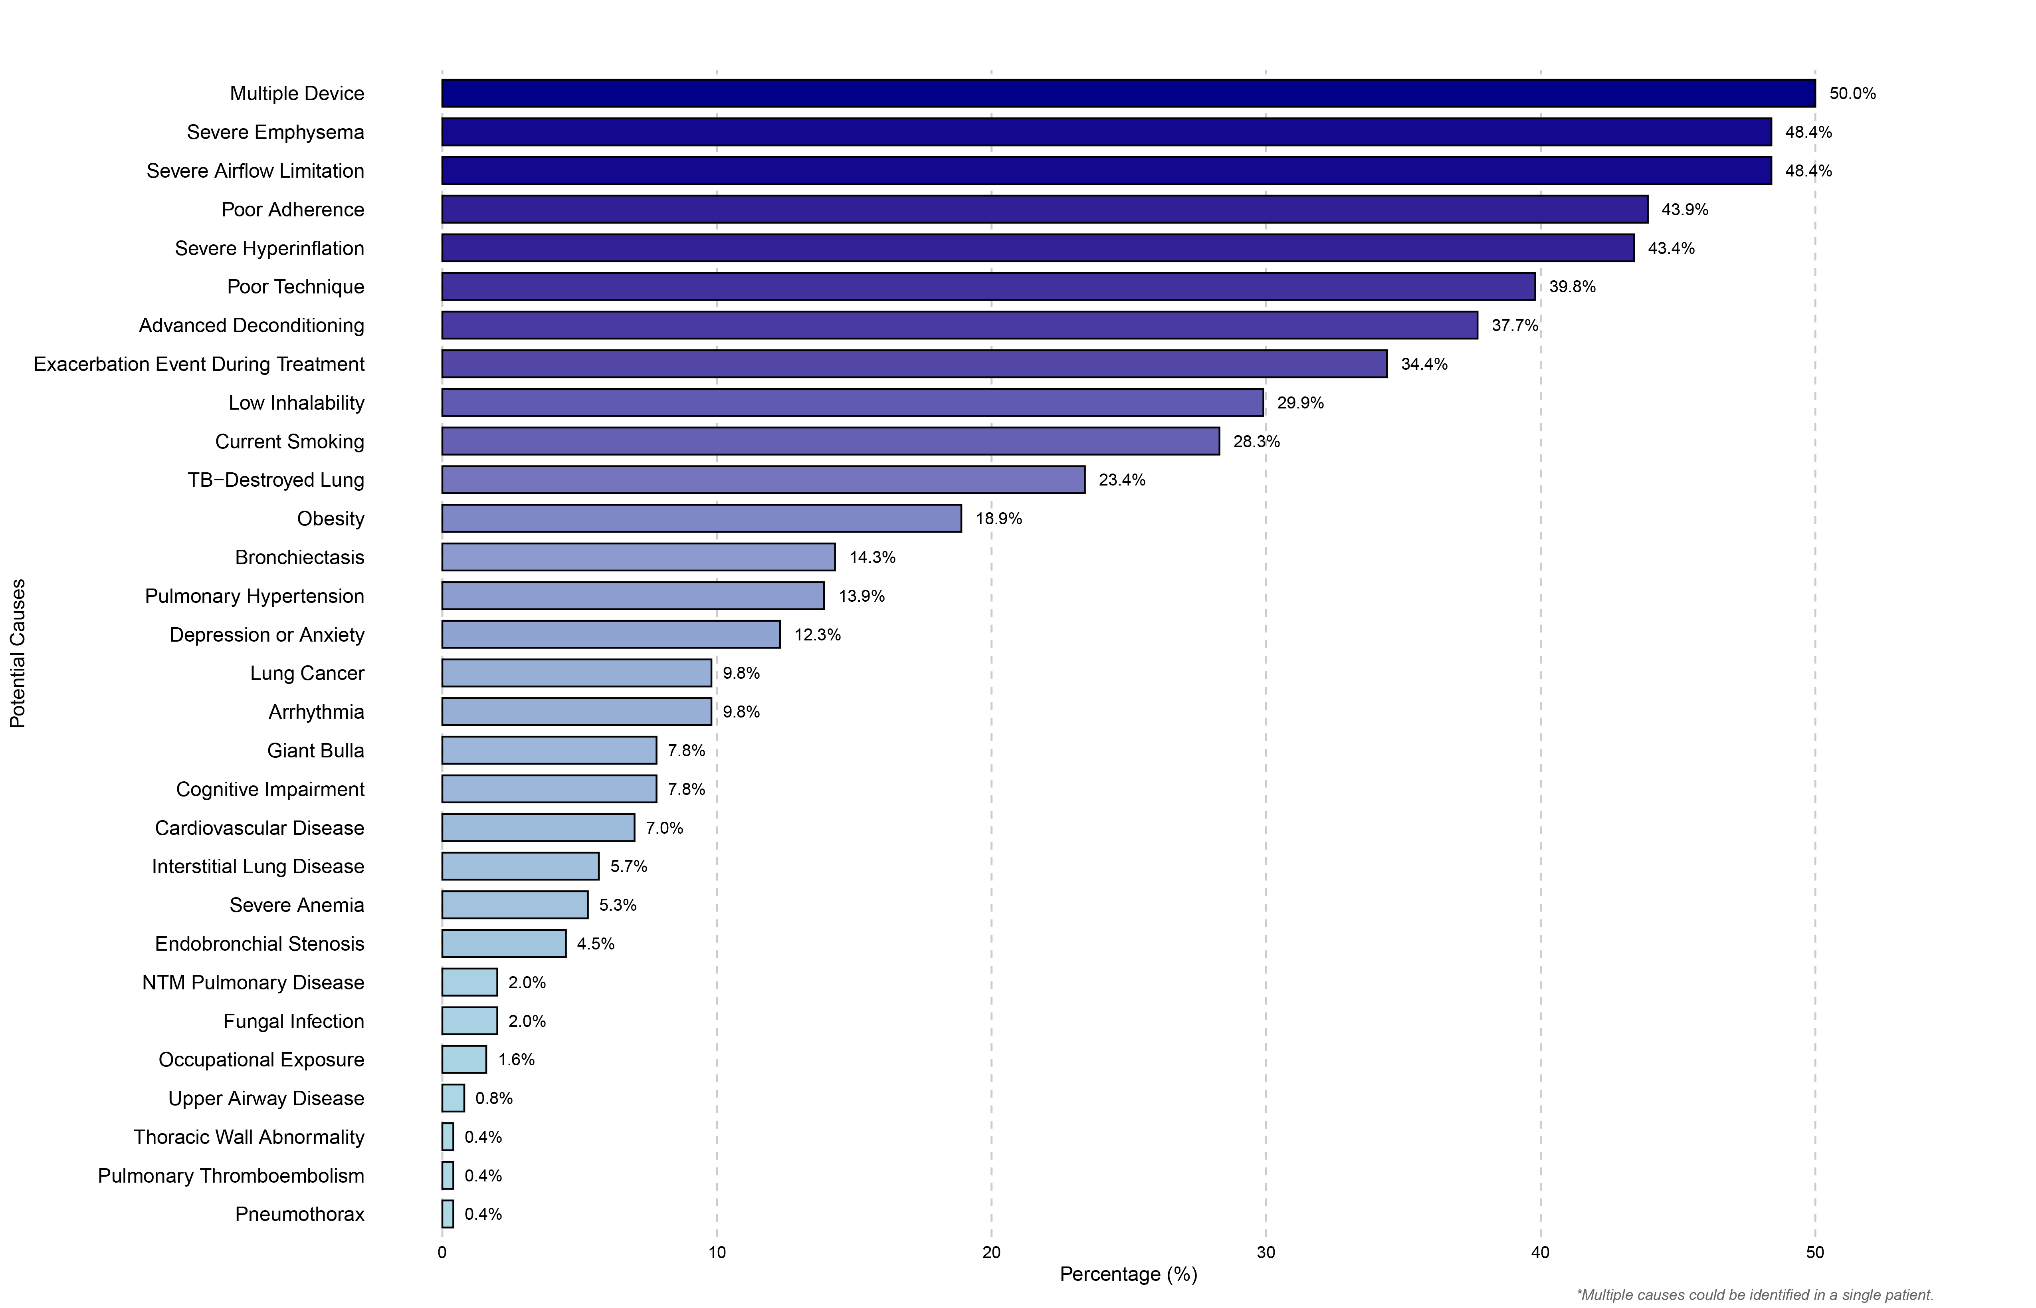
**

**Supplementary Figure S3.** Unadjusted odds ratios of potential contributors to refractory breathlessness

**
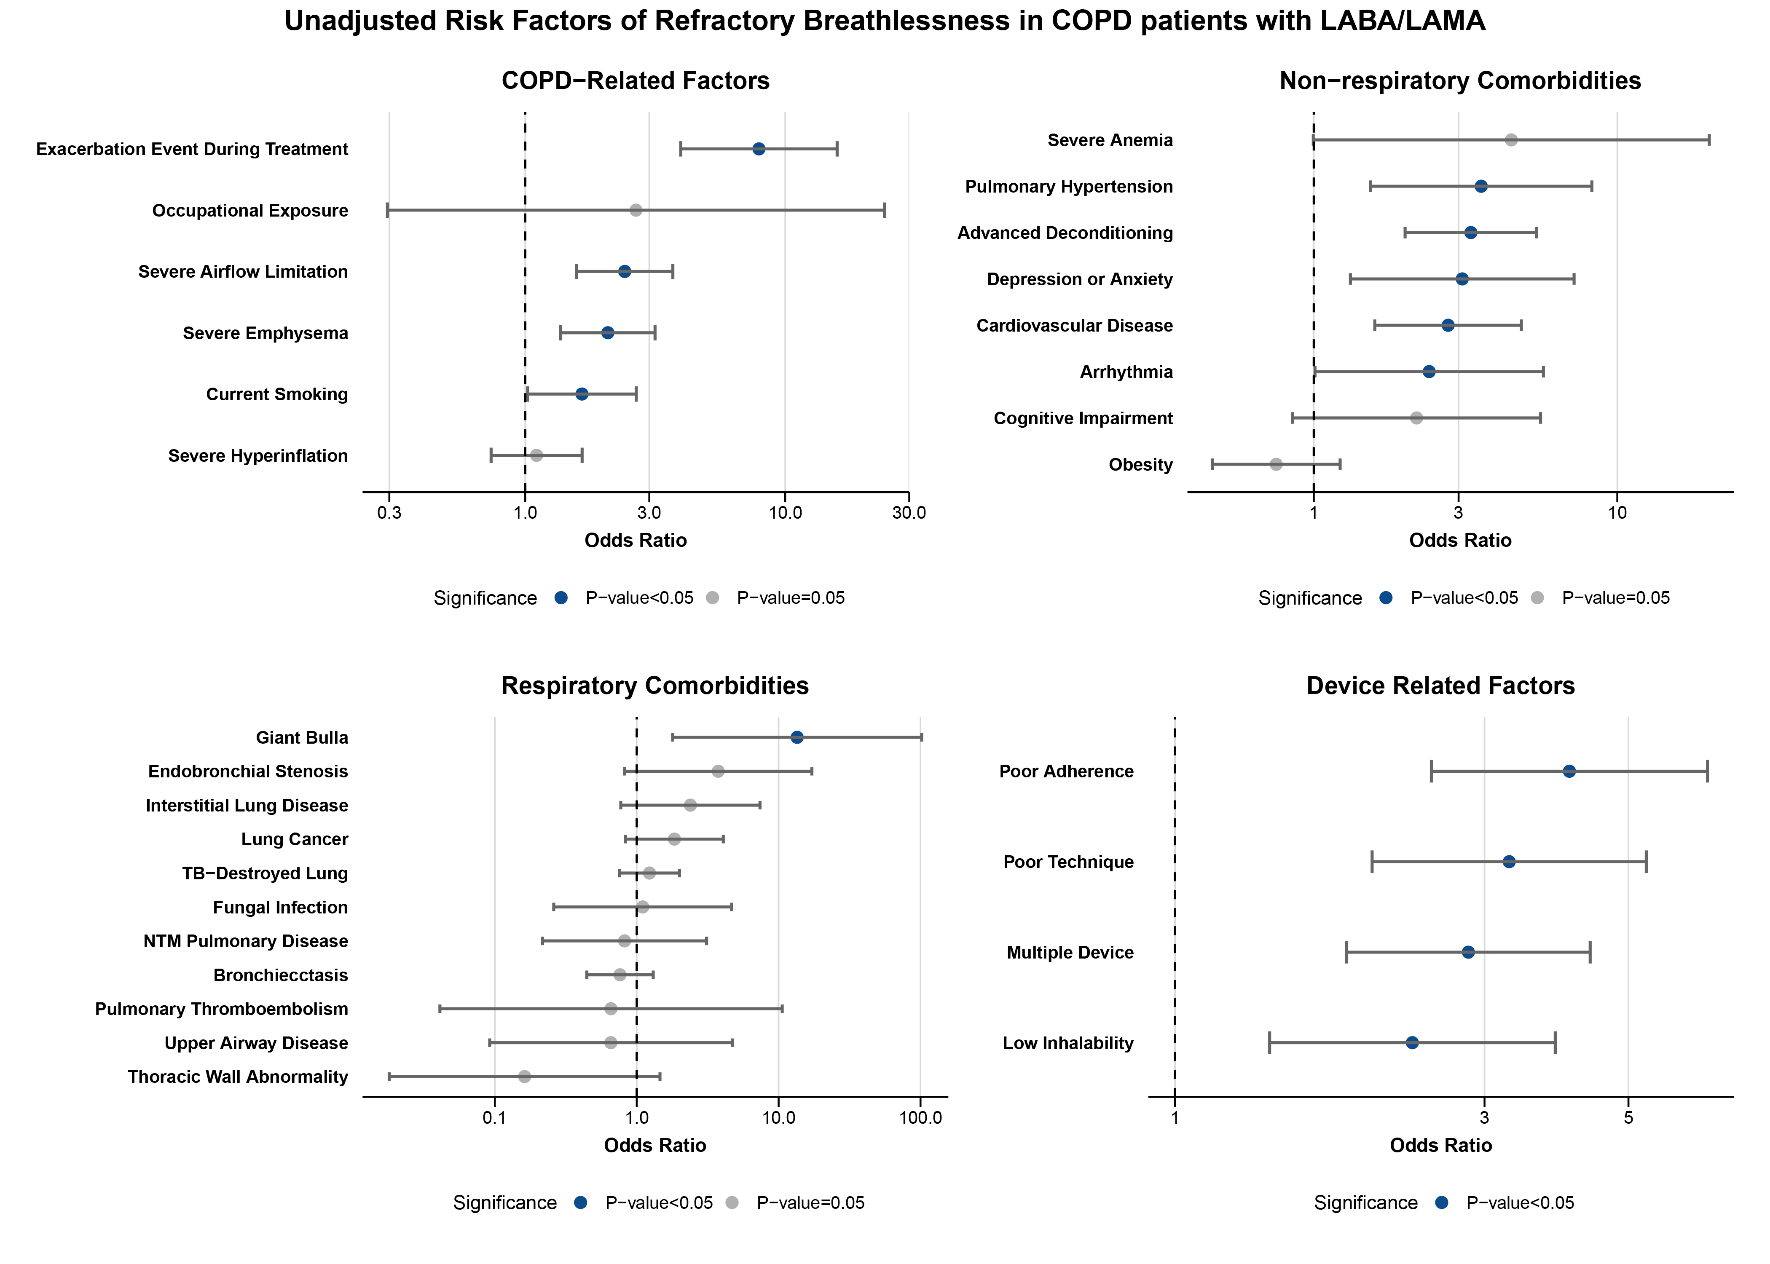
**

**Supplementary Figure S4.** Comparison of RB-Scores between improved and refractory breathlessness groups

**
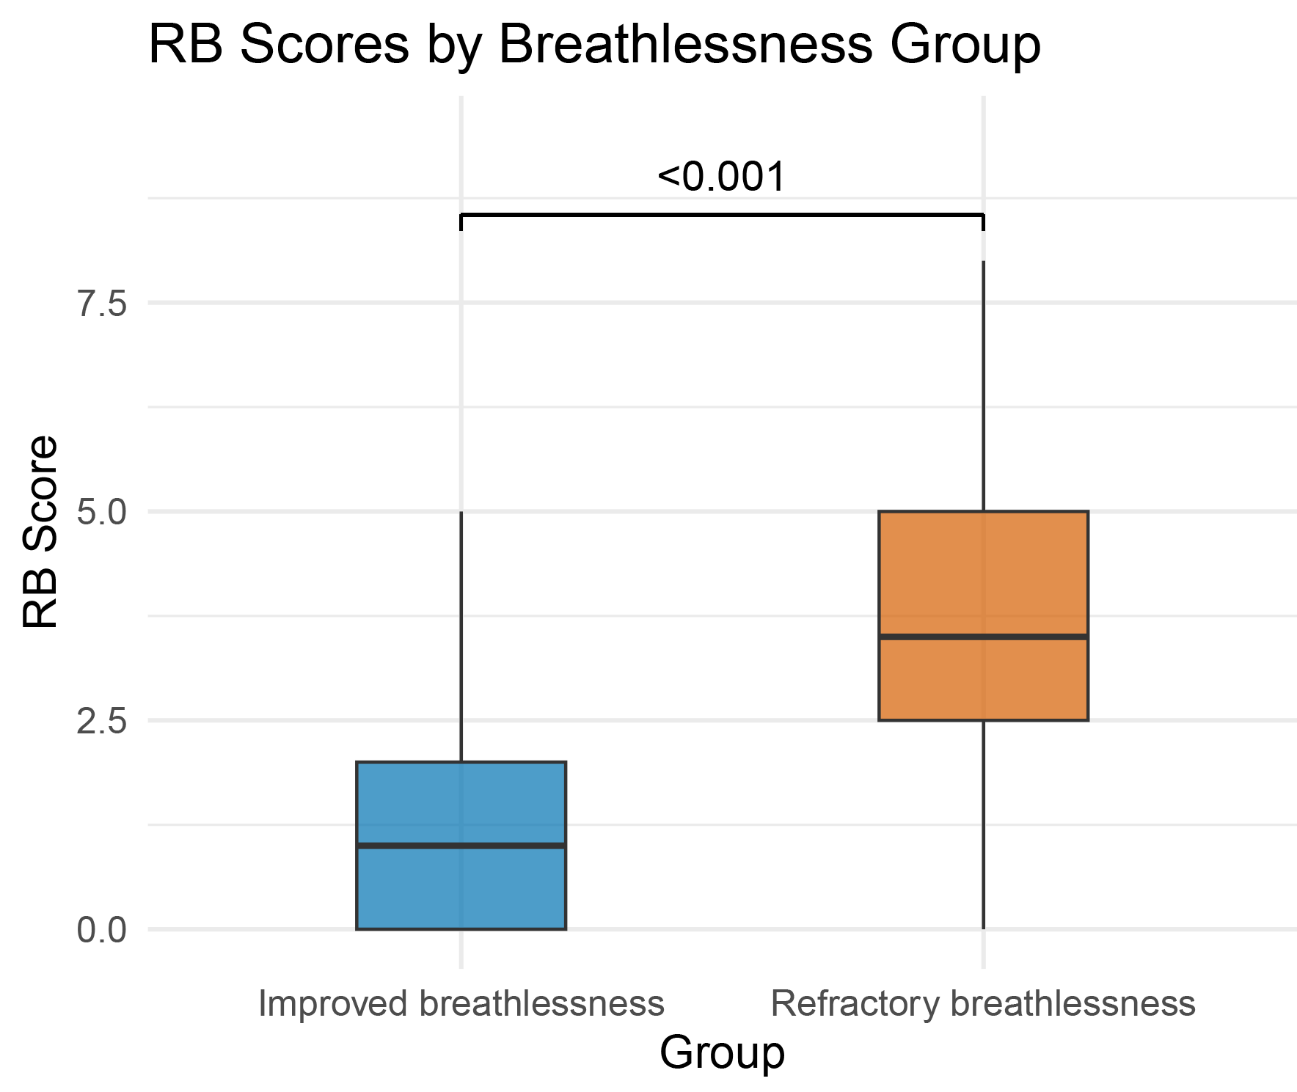
**

**Supplementary Figure S5.** Proportion of improved and refractory breathlessness groups by RB-Score

**
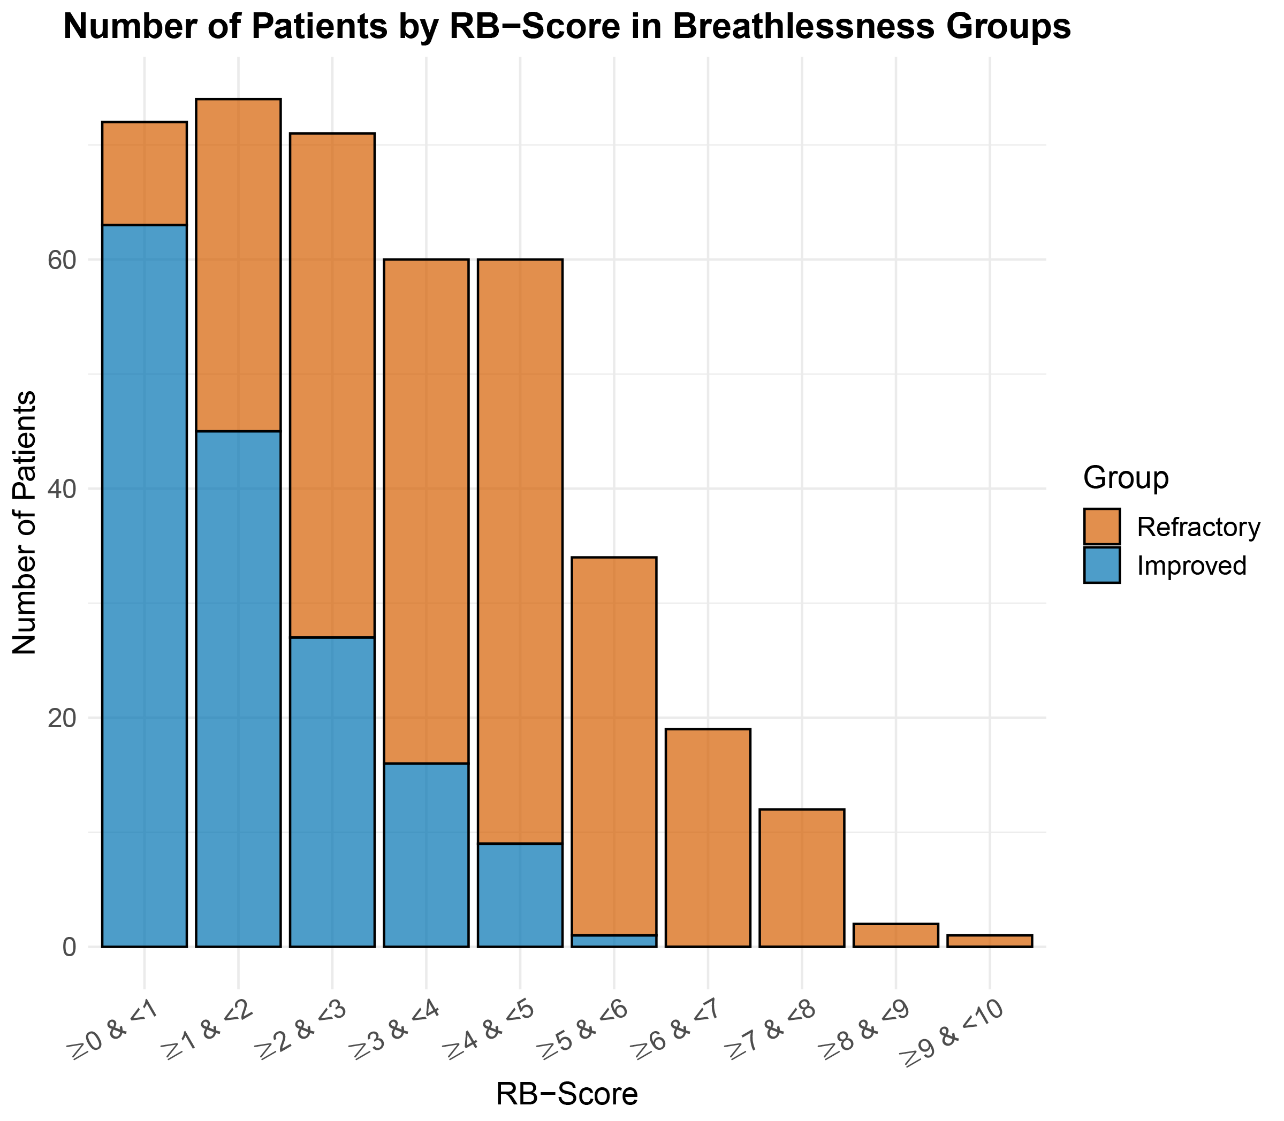
**

**Supplementary Figure S6.** Bootstrap-based calibration plot of RB-Score


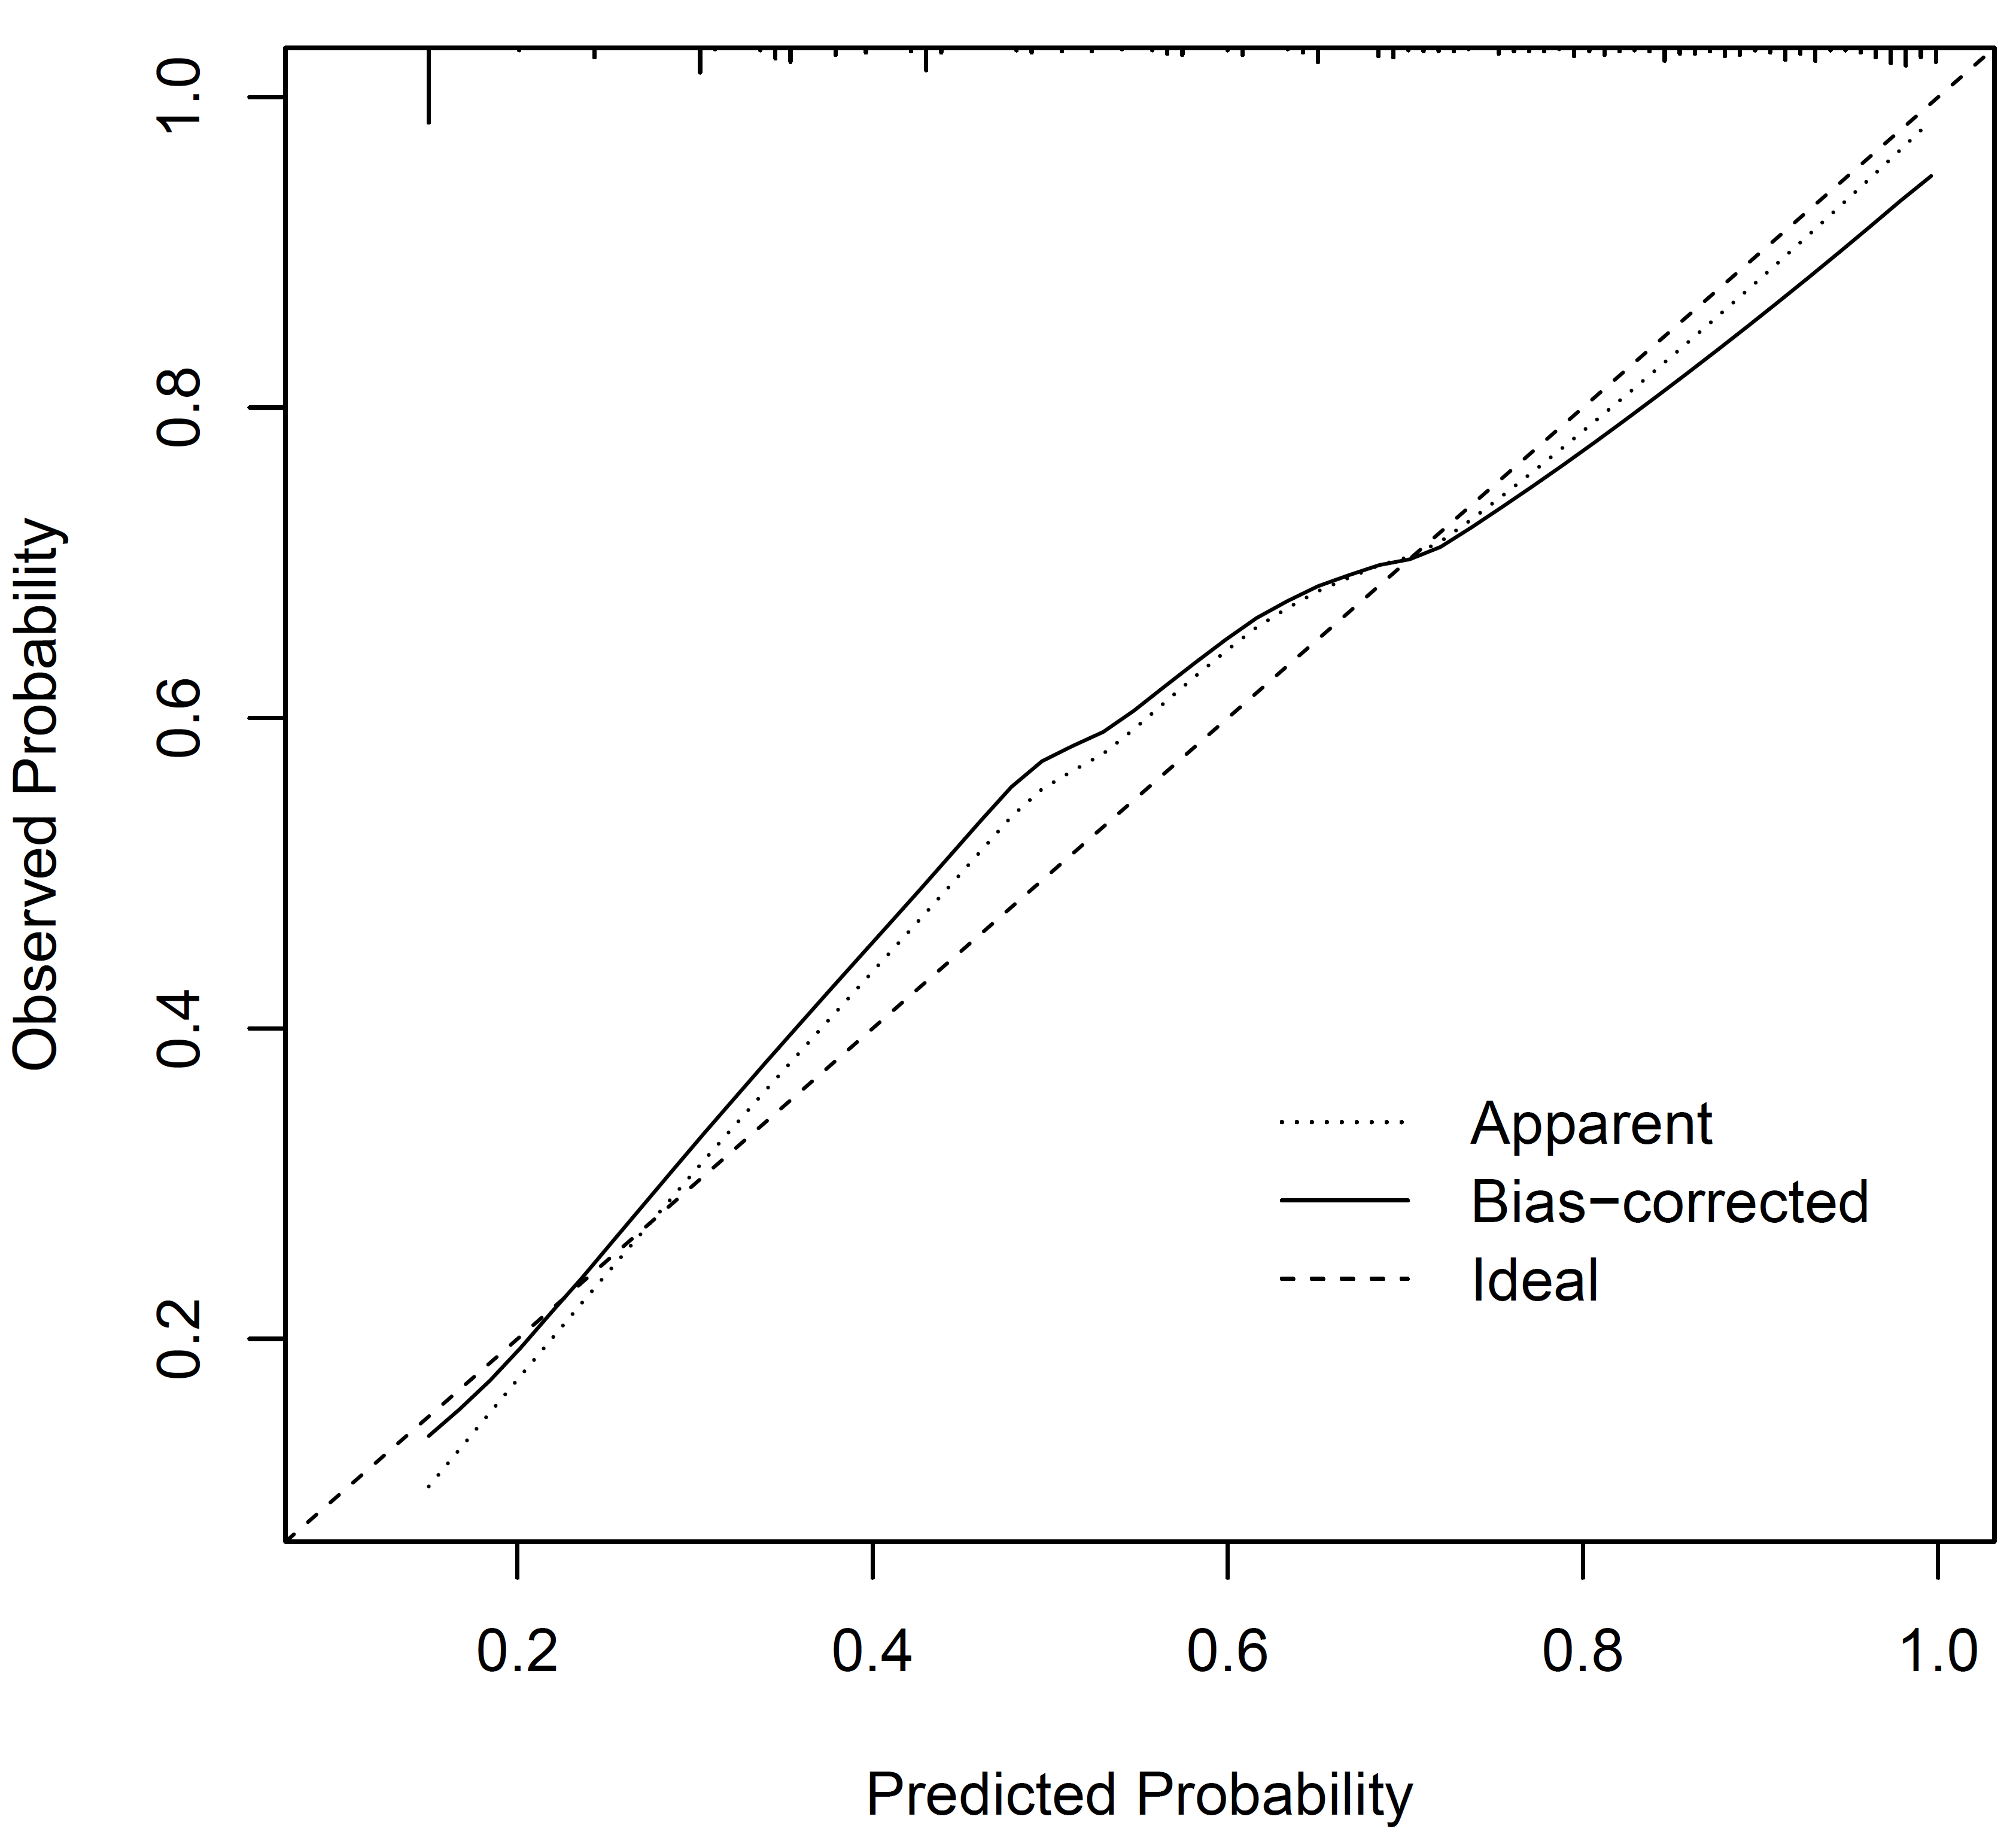


The dotted line represents apparent performance, the solid line represents bias-corrected performance, and the dashed line represents ideal calibration. Close agreement between the bias-corrected and ideal lines indicates adequate model calibration.

**Supplementary Figure S7.** Kaplan–Meier survival curves for all-cause mortality stratified by RB-Score risk groups

**
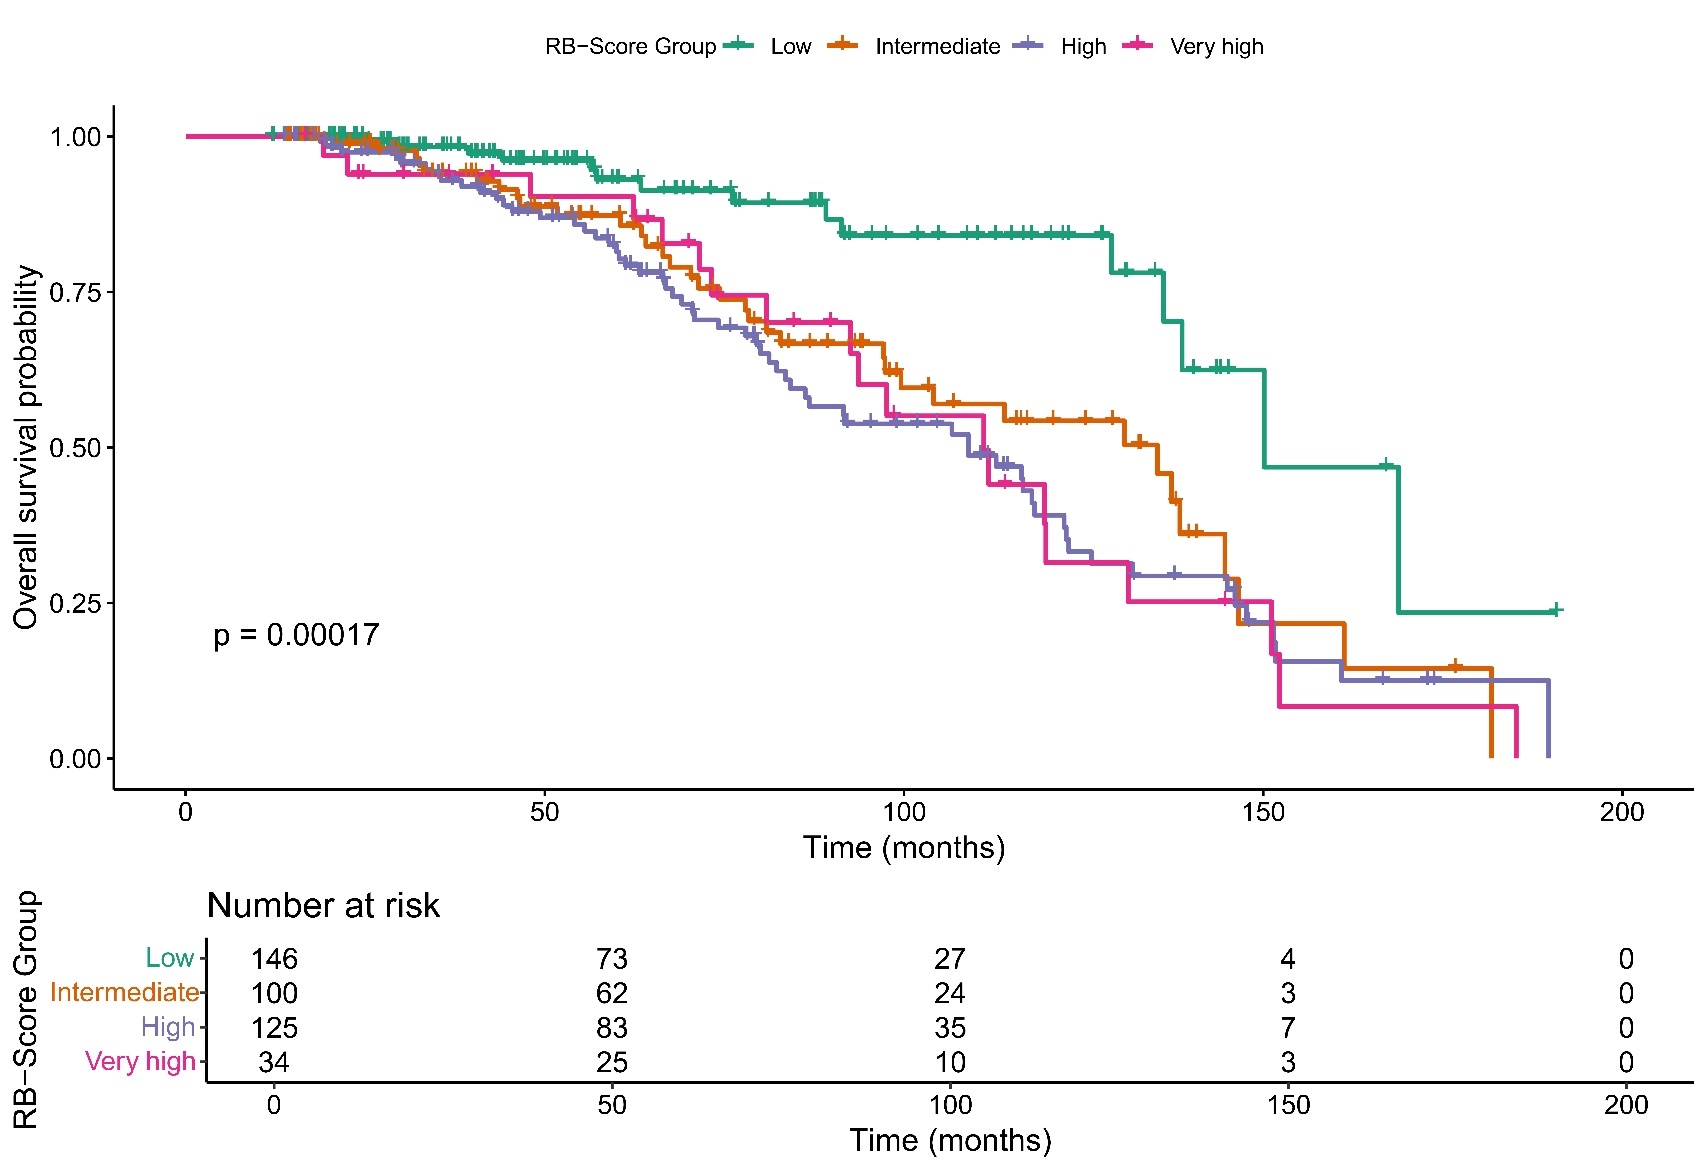
**

Kaplan–Meier survival estimates for time to all-cause mortality, stratified by RB-Score categories (Low [≤1.5], Intermediate [2.0–3.0], High [3.5–5.5], Very high [≥6.0]).
